# Supplementary material for: Comment on ‘SARS-CoV-2 suppresses anticoagulant and fibrinolytic gene expression in the lung’
Source: eLife. 2022 Jan 11;11:e74268. doi: 10.7554/eLife.74268 (PMC8752089; doi:10.7554/eLife.74268)
Supplement: Source data 1. — This file contains quality control reports generated during our reproduction of the Mast et al., 2021 data analysis in CLC Genomics Workbench. They demonstrate that we implemented identical analyses based on their description of their methods and provide useful summary information about the alignment process. [file elife-74268-supp3.zip]

Archive with 100 entries (99 files):
- Source Data 1 - CLC Alignment QC Reports/
- __MACOSX/._Source Data 1 - CLC Alignment QC Reports
- Source Data 1 - CLC Alignment QC Reports/SRR10571658_1 (RNA-Seq report).pdf
- __MACOSX/Source Data 1 - CLC Alignment QC Reports/._SRR10571658_1 (RNA-Seq report).pdf
- Source Data 1 - CLC Alignment QC Reports/SRR11092057_1 (RNA-Seq report).pdf
- __MACOSX/Source Data 1 - CLC Alignment QC Reports/._SRR11092057_1 (RNA-Seq report).pdf
- Source Data 1 - CLC Alignment QC Reports/SRR10571754_1 (RNA-Seq report).pdf
- __MACOSX/Source Data 1 - CLC Alignment QC Reports/._SRR10571754_1 (RNA-Seq report).pdf
- Source Data 1 - CLC Alignment QC Reports/SRR10571721_1 (RNA-Seq report).pdf
- __MACOSX/Source Data 1 - CLC Alignment QC Reports/._SRR10571721_1 (RNA-Seq report).pdf
- Source Data 1 - CLC Alignment QC Reports/SRR10571663_1 (RNA-Seq report).pdf
- __MACOSX/Source Data 1 - CLC Alignment QC Reports/._SRR10571663_1 (RNA-Seq report).pdf
- Source Data 1 - CLC Alignment QC Reports/SRR10571753_1 (RNA-Seq report).pdf
- __MACOSX/Source Data 1 - CLC Alignment QC Reports/._SRR10571753_1 (RNA-Seq report).pdf
- Source Data 1 - CLC Alignment QC Reports/SRR10571655_1 (RNA-Seq report).pdf
- __MACOSX/Source Data 1 - CLC Alignment QC Reports/._SRR10571655_1 (RNA-Seq report).pdf
- Source Data 1 - CLC Alignment QC Reports/SRR10571726_1 (RNA-Seq report).pdf
- __MACOSX/Source Data 1 - CLC Alignment QC Reports/._SRR10571726_1 (RNA-Seq report).pdf
- Source Data 1 - CLC Alignment QC Reports/SRR10571664_1 (RNA-Seq report).pdf
- __MACOSX/Source Data 1 - CLC Alignment QC Reports/._SRR10571664_1 (RNA-Seq report).pdf
- Source Data 1 - CLC Alignment QC Reports/SRR11092061_1 (RNA-Seq report).pdf
- __MACOSX/Source Data 1 - CLC Alignment QC Reports/._SRR11092061_1 (RNA-Seq report).pdf
- Source Data 1 - CLC Alignment QC Reports/SRR10571725_1 (RNA-Seq report).pdf
- __MACOSX/Source Data 1 - CLC Alignment QC Reports/._SRR10571725_1 (RNA-Seq report).pdf
- Source Data 1 - CLC Alignment QC Reports/SRR10571656_1 (RNA-Seq report).pdf
- __MACOSX/Source Data 1 - CLC Alignment QC Reports/._SRR10571656_1 (RNA-Seq report).pdf
- Source Data 1 - CLC Alignment QC Reports/SRR11092059_1 (RNA-Seq report).pdf
- __MACOSX/Source Data 1 - CLC Alignment QC Reports/._SRR11092059_1 (RNA-Seq report).pdf
- Source Data 1 - CLC Alignment QC Reports/SRR11092062_1 (RNA-Seq report).pdf
- __MACOSX/Source Data 1 - CLC Alignment QC Reports/._SRR11092062_1 (RNA-Seq report).pdf
- Source Data 1 - CLC Alignment QC Reports/SRR10571722_1 (RNA-Seq report).pdf
- __MACOSX/Source Data 1 - CLC Alignment QC Reports/._SRR10571722_1 (RNA-Seq report).pdf
- Source Data 1 - CLC Alignment QC Reports/SRR10571757_1 (RNA-Seq report).pdf
- __MACOSX/Source Data 1 - CLC Alignment QC Reports/._SRR10571757_1 (RNA-Seq report).pdf
- Source Data 1 - CLC Alignment QC Reports/SRR10571728_1 (RNA-Seq report).pdf
- __MACOSX/Source Data 1 - CLC Alignment QC Reports/._SRR10571728_1 (RNA-Seq report).pdf
- Source Data 1 - CLC Alignment QC Reports/SRR10571719_1 (RNA-Seq report).pdf
- __MACOSX/Source Data 1 - CLC Alignment QC Reports/._SRR10571719_1 (RNA-Seq report).pdf
- Source Data 1 - CLC Alignment QC Reports/SRR10571660_1 (RNA-Seq report).pdf
- __MACOSX/Source Data 1 - CLC Alignment QC Reports/._SRR10571660_1 (RNA-Seq report).pdf
- Source Data 1 - CLC Alignment QC Reports/SRR11092064_1 (RNA-Seq report).pdf
- __MACOSX/Source Data 1 - CLC Alignment QC Reports/._SRR11092064_1 (RNA-Seq report).pdf
- Source Data 1 - CLC Alignment QC Reports/SRR10571723_1 (RNA-Seq report).pdf
- __MACOSX/Source Data 1 - CLC Alignment QC Reports/._SRR10571723_1 (RNA-Seq report).pdf
- Source Data 1 - CLC Alignment QC Reports/SRR10571756_1 (RNA-Seq report).pdf
- __MACOSX/Source Data 1 - CLC Alignment QC Reports/._SRR10571756_1 (RNA-Seq report).pdf
- Source Data 1 - CLC Alignment QC Reports/SRR11092063_1 (RNA-Seq report).pdf
- __MACOSX/Source Data 1 - CLC Alignment QC Reports/._SRR11092063_1 (RNA-Seq report).pdf
- Source Data 1 - CLC Alignment QC Reports/SRR10571657_1 (RNA-Seq report).pdf
- __MACOSX/Source Data 1 - CLC Alignment QC Reports/._SRR10571657_1 (RNA-Seq report).pdf
- Source Data 1 - CLC Alignment QC Reports/SRR10571724_1 (RNA-Seq report).pdf
- __MACOSX/Source Data 1 - CLC Alignment QC Reports/._SRR10571724_1 (RNA-Seq report).pdf
- Source Data 1 - CLC Alignment QC Reports/SRR11092058_1 (RNA-Seq report).pdf
- __MACOSX/Source Data 1 - CLC Alignment QC Reports/._SRR11092058_1 (RNA-Seq report).pdf
- Source Data 1 - CLC Alignment QC Reports/SRR11092060_1 (RNA-Seq report).pdf
- __MACOSX/Source Data 1 - CLC Alignment QC Reports/._SRR11092060_1 (RNA-Seq report).pdf
- Source Data 1 - CLC Alignment QC Reports/SRR10571665_1 (RNA-Seq report).pdf
- __MACOSX/Source Data 1 - CLC Alignment QC Reports/._SRR10571665_1 (RNA-Seq report).pdf
- Source Data 1 - CLC Alignment QC Reports/SRR10571752_1 (RNA-Seq report).pdf
- __MACOSX/Source Data 1 - CLC Alignment QC Reports/._SRR10571752_1 (RNA-Seq report).pdf
- Source Data 1 - CLC Alignment QC Reports/SRR10571727_1 (RNA-Seq report).pdf
- __MACOSX/Source Data 1 - CLC Alignment QC Reports/._SRR10571727_1 (RNA-Seq report).pdf
- Source Data 1 - CLC Alignment QC Reports/SRR10571662_1 (RNA-Seq report).pdf
- __MACOSX/Source Data 1 - CLC Alignment QC Reports/._SRR10571662_1 (RNA-Seq report).pdf
- Source Data 1 - CLC Alignment QC Reports/SRR10571755_1 (RNA-Seq report).pdf
- __MACOSX/Source Data 1 - CLC Alignment QC Reports/._SRR10571755_1 (RNA-Seq report).pdf
- Source Data 1 - CLC Alignment QC Reports/SRR10571720_1 (RNA-Seq report).pdf
- __MACOSX/Source Data 1 - CLC Alignment QC Reports/._SRR10571720_1 (RNA-Seq report).pdf
- Source Data 1 - CLC Alignment QC Reports/SRR10571659_1 (RNA-Seq report).pdf
- __MACOSX/Source Data 1 - CLC Alignment QC Reports/._SRR10571659_1 (RNA-Seq report).pdf
- Source Data 1 - CLC Alignment QC Reports/SRR11092056_1 (RNA-Seq report).pdf
- __MACOSX/Source Data 1 - CLC Alignment QC Reports/._SRR11092056_1 (RNA-Seq report).pdf
- Source Data 1 - CLC Alignment QC Reports/SRR10571738_1 (RNA-Seq report).pdf
- __MACOSX/Source Data 1 - CLC Alignment QC Reports/._SRR10571738_1 (RNA-Seq report).pdf
- Source Data 1 - CLC Alignment QC Reports/SRR10571732_1 (RNA-Seq report).pdf
- __MACOSX/Source Data 1 - CLC Alignment QC Reports/._SRR10571732_1 (RNA-Seq report).pdf
- Source Data 1 - CLC Alignment QC Reports/SRR10571735_1 (RNA-Seq report).pdf
- __MACOSX/Source Data 1 - CLC Alignment QC Reports/._SRR10571735_1 (RNA-Seq report).pdf
- Source Data 1 - CLC Alignment QC Reports/SRR10571736_1 (RNA-Seq report).pdf
- __MACOSX/Source Data 1 - CLC Alignment QC Reports/._SRR10571736_1 (RNA-Seq report).pdf
- Source Data 1 - CLC Alignment QC Reports/SRR10571743_1 (RNA-Seq report).pdf
- __MACOSX/Source Data 1 - CLC Alignment QC Reports/._SRR10571743_1 (RNA-Seq report).pdf
- Source Data 1 - CLC Alignment QC Reports/SRR10571731_1 (RNA-Seq report).pdf
- __MACOSX/Source Data 1 - CLC Alignment QC Reports/._SRR10571731_1 (RNA-Seq report).pdf
- Source Data 1 - CLC Alignment QC Reports/SRR10571744_1 (RNA-Seq report).pdf
- __MACOSX/Source Data 1 - CLC Alignment QC Reports/._SRR10571744_1 (RNA-Seq report).pdf
- Source Data 1 - CLC Alignment QC Reports/SRR10571730_1 (RNA-Seq report).pdf
- __MACOSX/Source Data 1 - CLC Alignment QC Reports/._SRR10571730_1 (RNA-Seq report).pdf
- Source Data 1 - CLC Alignment QC Reports/SRR10571737_1 (RNA-Seq report).pdf
- __MACOSX/Source Data 1 - CLC Alignment QC Reports/._SRR10571737_1 (RNA-Seq report).pdf
- Source Data 1 - CLC Alignment QC Reports/SRR10571742_1 (RNA-Seq report).pdf
- __MACOSX/Source Data 1 - CLC Alignment QC Reports/._SRR10571742_1 (RNA-Seq report).pdf
- Source Data 1 - CLC Alignment QC Reports/SRR10571741_1 (RNA-Seq report).pdf
- __MACOSX/Source Data 1 - CLC Alignment QC Reports/._SRR10571741_1 (RNA-Seq report).pdf
- Source Data 1 - CLC Alignment QC Reports/SRR10571734_1 (RNA-Seq report).pdf
- __MACOSX/Source Data 1 - CLC Alignment QC Reports/._SRR10571734_1 (RNA-Seq report).pdf
- Source Data 1 - CLC Alignment QC Reports/SRR10571733_1 (RNA-Seq report).pdf
- __MACOSX/Source Data 1 - CLC Alignment QC Reports/._SRR10571733_1 (RNA-Seq report).pdf
- Source Data 1 - CLC Alignment QC Reports/SRR10571739_1 (RNA-Seq report).pdf
- __MACOSX/Source Data 1 - CLC Alignment QC Reports/._SRR10571739_1 (RNA-Seq report).pdf
