# Supplementary material for: Comment on ‘SARS-CoV-2 suppresses anticoagulant and fibrinolytic gene expression in the lung’
Source: eLife. 2022 Jan 11;11:e74268. doi: 10.7554/eLife.74268 (PMC8752089; doi:10.7554/eLife.74268)
Supplement: Supplementary file 1. — The genes included in the subset were generated using Ensembl Biomart. We first selected human genes (GRCh38.p13) as our data set, before then filtering to only include genes annotated as rRNA encoding (Gene type = rRNA). All rRNA genes identified in the data set with any counts were included. [file elife-74268-supp1.xlsx]

## Sheet: Sheet1
RefSeq ncRNA ID	Gene name	Ref_seq ncRNA Version	SRR10571655_1 (GE) - Total counts	SRR10571656_1 (GE) - Total counts	SRR10571657_1 (GE) - Total counts	SRR10571658_1 (GE) - Total counts	SRR10571659_1 (GE) - Total counts	SRR10571660_1 (GE) - Total counts	SRR10571662_1 (GE) - Total counts	SRR10571663_1 (GE) - Total counts	SRR10571664_1 (GE) - Total counts	SRR10571665_1 (GE) - Total counts	SRR10571719_1 (GE) - Total counts	SRR10571720_1 (GE) - Total counts	SRR10571721_1 (GE) - Total counts	SRR10571722_1 (GE) - Total counts	SRR10571723_1 (GE) - Total counts	SRR10571724_1 (GE) - Total counts	SRR10571725_1 (GE) - Total counts	SRR10571726_1 (GE) - Total counts	SRR10571727_1 (GE) - Total counts	SRR10571728_1 (GE) - Total counts	SRR10571730_1 (GE) - Total counts	SRR10571731_1 (GE) - Total counts	SRR10571732_1 (GE) - Total counts	SRR10571733_1 (GE) - Total counts	SRR10571734_1 (GE) - Total counts	SRR10571735_1 (GE) - Total counts	SRR10571736_1 (GE) - Total counts	SRR10571737_1 (GE) - Total counts	SRR10571738_1 (GE) - Total counts	SRR10571739_1 (GE) - Total counts	SRR10571741_1 (GE) - Total counts	SRR10571742_1 (GE) - Total counts	SRR10571743_1 (GE) - Total counts	SRR10571744_1 (GE) - Total counts	SRR10571752_1 (GE) - Total counts	SRR10571753_1 (GE) - Total counts	SRR10571754_1 (GE) - Total counts	SRR10571755_1 (GE) - Total counts	SRR10571756_1 (GE) - Total counts	SRR10571757_1 (GE) - Total counts	SRR11092056_1 (GE) - Total counts	SRR11092057_1 (GE) - Total counts	SRR11092058_1 (GE) - Total counts	SRR11092059_1 (GE) - Total counts	SRR11092060_1 (GE) - Total counts	SRR11092061_1 (GE) - Total counts	SRR11092062_1 (GE) - Total counts
NR_146118	RNA28SN4	NR_146118.1	115731	694609	62233	229937	427993	91933	372102	408776	244991	92057	112816	49248	297209	100147	41516	581807	104989	114214	119300	189694	61280	31250	177395	63430	277415	173910	170752	105048	82994	187791	370622	189843	366486	184786	365283	188923	333846	201713	56032	186043	17424	50890	19171	620824	803788	1104244	399887
NR_145822	RNA28SN1	NR_145822.1	115874	17707	35292	143902	259732	145688	18359	415121	340881	260062	6865	39423	122547	168355	20965	22500	137065	50575	166798	210653	22637	24078	68838	157826	350369	148908	69583	78324	152109	131028	214522	104307	89123	223453	282961	223000	203318	67425	5801	59025	6363	17460	12856	548922	209729	1247921	139010
NR_146146	RNA18SN2	NR_146146.1	42016	36291	19297	35497	58353	16030	29437	64560	61845	54241	18717	19209	33661	32188	13226	58058	16645	25620	49045	34509	20729	20824	39240	42863	63992	32577	28064	20867	27533	40223	50908	21673	43864	47309	74354	32110	60877	22091	12301	30637	2163	12952	5150	242900	359117	844241	244016
NR_146152	RNA18SN3	NR_146152.1	42589	36424	19235	35747	58201	15967	29321	64594	61865	54460	18984	19189	33755	31675	13171	58199	16306	25302	49085	34563	20901	20395	39192	42707	64081	31997	27827	20622	27872	40220	50580	21249	43906	47210	73893	32018	60743	22030	12252	30243	2077	13086	5090	243748	361136	844788	244726
NR_146119	RNA18SN4	NR_146119.1	42531	36237	19317	35409	57955	16234	29271	64613	61982	54479	19230	19093	33551	31963	13296	57918	16224	25470	48886	34676	20624	20492	39308	42690	64855	32462	28232	20672	27651	39666	50784	21582	43454	47320	74158	32160	60343	21853	12182	30064	2125	13010	5105	243126	359641	843921	245290
NR_146148	RNA28SN2	NR_146148.1	1167	1603	647	1658	2393	1527	1374	2386	3222	1191	477	382	1914	2104	436	1727	1171	586	1568	1360	368	302	1963	1965	2574	1580	1536	1201	1003	1525	2033	886	1782	1758	3144	1827	2169	1710	291	945	6327	31859	20924	191454	466345	1315060	451734
NR_146154	RNA28SN3	NR_146154.1	141012	21894	33200	151265	106630	136578	70027	287227	366972	194829	51849	19417	128121	292344	35987	84768	100419	61154	275781	57408	78572	21338	225242	208298	326124	185526	236140	69824	197004	208358	120910	139680	41551	179544	49895	60856	143317	105322	18770	9860	1337	14271	1655	24640	30411	75732	50851
NR_146144	RNA45SN2	NR_146144.1	24	1926	14	244	712	219	260	795	335	53	346	52	199	241	5	983	264	86	1787	341	9	12	565	529	1656	1018	121	130	423	389	493	539	150	795	798	112	1407	396	13	135	3691	4828	9186	8485	16269	34922	29366
NR_146117	RNA45SN4	NR_145822.1	255	2626	164	448	1668	200	470	2079	1991	977	250	195	460	344	142	1694	394	162	852	568	223	183	590	472	1952	678	309	73	485	450	2070	485	445	416	1454	315	757	223	143	351	2773	3653	6997	10920	21004	48526	32002
NR_145819	RNA45SN1	NR_145819.1	72	290	0	248	464	354	278	767	251	140	128	87	292	92	108	1495	70	163	507	243	30	0	94	68	904	229	137	94	92	99	428	104	302	215	875	305	278	145	0	11	2169	2182	4617	5354	10303	19870	15310
NR_046235	RNA45SN5	NR_046235.3	8	13	0	83	0	30	26	195	98	41	35	6	93	6	27	199	0	0	5	2	2	0	3	1	19	2	43	43	12	19	23	22	142	8	63	25	4	1	0	3	539	964	201	756	646	3019	4169
NR_146120	RNA5-8SN4	NR_146120.1	895	514	514	874	655	464	770	1709	1999	954	460	956	850	841	1122	497	669	829	1290	646	693	312	723	1030	1418	664	232	470	489	617	932	1085	642	889	706	964	1239	896	355	686	0	0	0	0	0	0	0
NR_023371	RNA5S9	NR_023371.1	0	0	0	0	0	0	0	0	0	0	0	0	0	0	0	0	0	0	0	0	0	0	0	0	0	0	0	0	0	0	0	0	0	0	0	0	0	0	0	0	0	1	0	0	0	0	0
NR_145820	RNA18SN1	NR_145820.1	0	0	27	0	0	0	0	0	0	0	0	0	0	0	0	0	3	0	0	0	4	0	0	0	0	0	0	1	0	0	0	0	0	1	0	0	0	0	0	3	0	0	0	0	0	0	0
NR_003286	RNA18SN5	NR_003286.4	0	0	28	0	0	0	0	0	0	0	0	0	0	0	0	0	2	0	0	0	4	0	0	1	0	0	0	1	0	0	0	0	0	0	0	0	0	0	0	2	0	0	0	0	0	0	0
NR_003287	RNA28SN5	NR_003287.4	981	326	4927	15577	22066	334	153	21385	41609	16746	354	49	8812	99	385	1756	2112	2712	191	1289	151	171	867	405	193	97	2629	16780	1458	4437	9054	1225	22536	1807	485	609	165	5	344	2341	0	0	0	812	0	0	0
NR_146151	RNA45SN3	NR_146151.1	283	166	77	90	23	42	105	1519	1342	581	34	136	303	804	54	11	11	0	229	111	88	93	61	231	627	23	186	47	155	312	316	41	184	33	460	251	136	0	80	8	80	92	149	763	1308	3799	1485
NR_145821	RNA5-8SN1	NR_145821.1	45	94	2	1	73	1	1	189	120	157	1	2	40	2	35	100	39	1	78	0	3	0	38	82	1	2	163	1	29	128	44	0	31	2	114	3	94	1	0	1	0	0	0	0	0	0	0
NR_146147	RNA5-8SN2	NR_146147.1	45	114	0	1	67	0	1	180	118	144	1	1	35	3	44	120	37	1	73	1	3	1	45	65	2	0	172	2	38	112	36	2	39	5	116	4	66	3	1	0	0	0	0	0	0	0	0
NR_146153	RNA5-8SN3	NR_146153.1	33	105	2	2	70	3	3	190	113	176	0	3	39	1	33	111	38	2	69	0	1	0	37	66	4	1	137	0	32	125	29	3	42	1	112	1	80	1	0	0	0	0	0	0	0	0	0
NR_003285	RNA5-8SN5	NR_003285.3	32	101	2	2	77	0	0	190	109	168	1	1	33	0	29	99	46	2	84	1	1	0	38	89	0	0	141	3	35	113	25	2	36	2	96	2	55	1	2	0	0	0	0	0	0	0	0
NR_023363	RNA5S1	NR_023363.1	0	0	0	0	0	0	0	0	0	0	0	0	0	0	0	0	0	0	0	0	0	0	0	0	0	0	0	0	0	0	0	0	0	0	0	0	0	0	0	0	0	0	0	0	0	0	0
NR_023364	RNA5S2	NR_023364.1	0	0	0	0	0	0	0	0	0	0	0	0	0	0	0	0	0	0	0	0	0	0	0	0	0	0	0	0	0	0	0	0	0	0	0	0	0	0	0	0	0	0	0	0	0	0	0
NR_023365	RNA5S3	NR_023365.1	0	0	0	0	0	0	0	0	0	0	0	0	0	0	0	0	0	0	0	0	0	0	0	0	0	0	0	0	0	0	0	0	0	0	0	0	0	0	0	0	0	0	0	0	0	0	0
NR_023374	RNA5S3	NR_023374.1	0	0	0	0	0	0	0	0	0	0	0	0	0	0	0	0	0	0	0	0	0	0	0	0	0	0	0	0	0	0	0	0	0	0	0	0	0	0	0	0	0	0	0	0	0	0	0
NR_023366	RNA5S4	NR_023366.1	0	0	0	0	0	0	0	0	0	0	0	0	0	0	0	0	0	0	0	0	0	0	0	0	0	0	0	0	0	0	0	0	0	0	0	0	0	0	0	0	0	0	0	0	0	0	0
NR_023367	RNA5S5	NR_023367.1	0	0	0	0	0	0	0	0	0	0	0	0	0	0	0	0	0	0	0	0	0	0	0	0	0	0	0	0	0	0	0	0	0	0	0	0	0	0	0	0	0	0	0	0	0	0	0
NR_023368	RNA5S6	NR_023368.1	0	0	0	0	0	0	0	0	0	0	0	0	0	0	0	0	0	0	0	0	0	0	0	0	0	0	0	0	0	0	0	0	0	0	0	0	0	0	0	0	0	0	0	0	0	0	0
NR_023369	RNA5S7	NR_023369.1	0	0	0	0	0	0	0	0	0	0	0	0	0	0	0	0	0	0	0	0	0	0	0	0	0	0	0	0	0	0	0	0	0	0	0	0	0	0	0	0	0	0	0	0	0	0	0
NR_023370	RNA5S8	NR_023370.1	0	0	0	0	0	0	0	0	0	0	0	0	0	0	0	0	0	0	0	0	0	0	0	0	0	0	0	0	0	0	0	0	0	0	0	0	0	0	0	0	0	0	0	0	0	0	0
NR_023372	RNA5S10	NR_023372.1	0	0	0	0	0	0	0	0	0	0	0	0	0	0	0	0	0	0	0	0	0	0	0	0	0	0	0	0	0	0	0	0	0	0	0	0	0	0	0	0	0	0	0	0	0	0	0
NR_023373	RNA5S11	NR_023373.1	0	0	0	0	0	0	0	0	0	0	0	0	0	0	0	0	0	0	0	0	0	0	0	0	0	0	0	0	0	0	0	0	0	0	0	0	0	0	0	0	0	0	0	0	0	0	0
NR_023375	RNA5S13	NR_023375.1	0	0	0	0	0	0	0	0	0	0	0	0	0	0	0	0	0	0	0	0	0	0	0	0	0	0	0	0	0	0	0	0	0	0	0	0	0	0	0	0	0	0	0	0	0	0	0
NR_023376	RNA5S14	NR_023376.1	0	0	0	0	0	0	0	0	0	0	0	0	0	0	0	0	0	0	0	0	0	0	0	0	0	0	0	0	0	0	0	0	0	0	0	0	0	0	0	0	0	0	0	0	0	0	0
NR_023377	RNA5S15	NR_023377.1	0	0	0	0	0	0	0	0	0	0	0	0	0	0	0	0	0	0	0	0	0	0	0	0	0	0	0	0	0	0	0	0	0	0	0	0	0	0	0	0	0	0	0	0	0	0	0
NR_023378	RNA5S16	NR_023378.1	0	0	0	0	0	0	0	0	0	0	0	0	0	0	0	0	0	0	0	0	0	0	0	0	0	0	0	0	0	0	0	0	0	0	0	0	0	0	0	0	0	0	0	0	0	0	0
NR_023379	RNA5S17	NR_023379.1	0	0	0	0	0	0	0	0	0	0	0	0	0	0	0	0	0	0	0	0	0	0	0	0	0	0	0	0	0	0	0	0	0	0	0	0	0	0	0	0	0	0	0	0	0	0	0
NR_023379	RNA5S17	NR_023379.1	0	0	0	0	0	0	0	0	0	0	0	0	0	0	0	0	0	0	0	0	0	0	0	0	0	0	0	0	0	0	0	0	0	0	0	0	0	0	0	0	0	0	0	0	0	0	0
		Total rRNA Reads	503593	851040	194978	650985	997132	425604	551958	1336475	1189843	731456	230548	167449	661914	661209	140581	872042	396504	306879	715628	566065	226323	139451	594239	562818	1156186	609674	566404	334203	519414	655612	873809	502728	654715	735554	928967	573485	868894	443816	118567	350358	47068	165248	91101	2142704	2639697	6386043	1857846
		Total Reads	43994879	40044199	45524780	43023697	43980584	47229775	50315132	44686325	44345487	45203718	41757523	43877197	39581386	44349370	43288416	46056753	43797155	46874311	41578452	45257422	43886408	44731424	46801418	41736818	43309687	44581528	42047726	40141489	44421900	46280783	39692941	49302692	47114669	47024019	44005556	43495202	45794785	41903576	41816333	43808608	285410	431137	558095	2706478	4078894	8313714	5087570
		Percent rRNA Reads	0.0114466	0.0212525	0.0042829	0.0151308	0.0226721	0.00901135	0.01097	0.0299079	0.0268312	0.0161813	0.00552111	0.00381631	0.0167229	0.0149091	0.00324754	0.0189341	0.00905319	0.00654685	0.0172115	0.0125077	0.00515702	0.00311752	0.012697	0.0134849	0.0266958	0.0136755	0.0134705	0.00832563	0.0116927	0.014166	0.0220142	0.0101968	0.0138962	0.0156421	0.0211102	0.013185	0.0189736	0.0105914	0.00283542	0.00799747	0.164914	0.383284	0.163236	0.791695	0.64716	0.768134	0.365174
		Non rRNA Reads	43491286	39193159	45329802	42372712	42983452	46804171	49763174	43349850	43155644	44472262	41526975	43709748	38919472	43688161	43147835	45184711	43400651	46567432	40862824	44691357	43660085	44591973	46207179	41174000	42153501	43971854	41481322	39807286	43902486	45625171	38819132	48799964	46459954	46288465	43076589	42921717	44925891	41459760	41697766	43458250	238342	265889	466994	563774	1439197	1927671	3229724
		All reads are post-CLC genomics workbench processing
[truncated: 2 more columns]
